# Supplementary material
Source: publisher figshare collection journal article supplement (https://acs.figshare.com/ndownloader/files/8135639)
Supplement: Supplementary file 1 [file 8135639]

# **Supporting Information**

## **Designing Ultra-Low Hydrate Adhesion Surfaces by Interfacial Spreading of Water-Immiscible Barrier Films**

*Arindam Das<sup>†</sup>, Taylor A. Farnham<sup>‡</sup>, Srinivas Bengaluru Subramanyam<sup>§</sup>, Kripa K. Varanasi\**

Department Mechanical Engineering, Massachusetts Institute of Technology,

77 Massachusetts Ave., Cambridge MA, 02139, USA.

\* Email: [varanasi@mit.edu](mailto:varanasi@mit.edu)

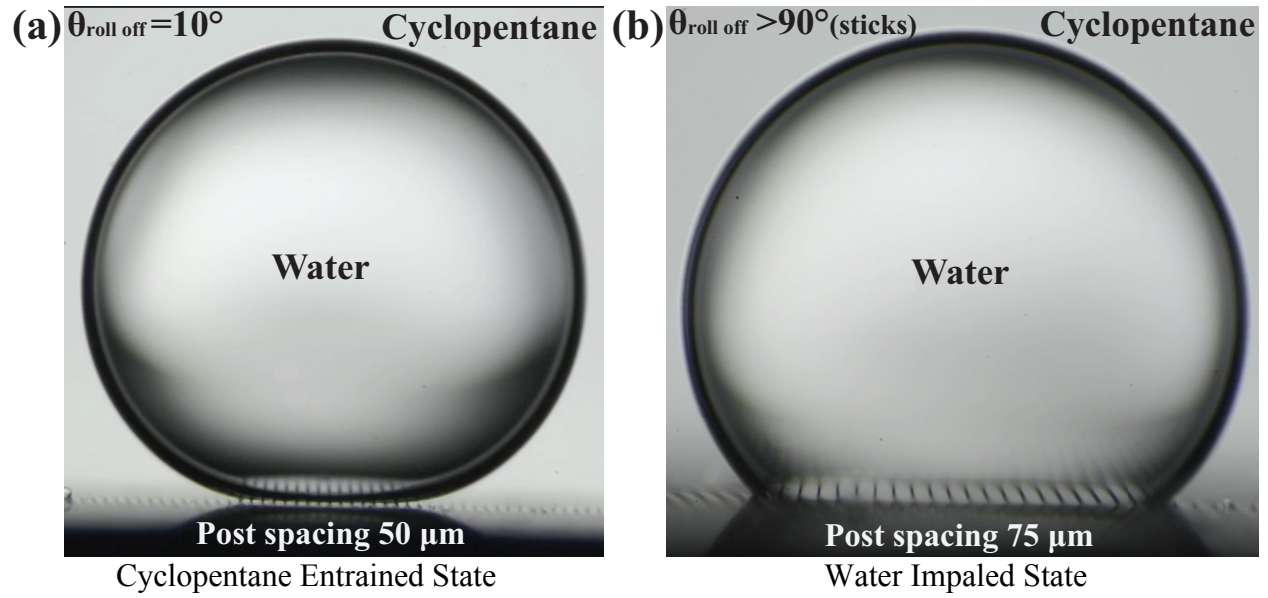

Figure (a) and (b) show water droplets inside the cyclopentane environment at (a) Cyclopentane entrained and (b) water impaled states on textured FS surfaces of 50 $\mu\text{m}$  and 75 $\mu\text{m}$  post spacing respectively.
